# Supplementary material for: Anti–Zika Virus Activity and Isolation of Flavonoids from Ethanol Extracts of Curatella americana L. Leaves
Source: MDPI journal article supplement (doi:10.3390/molecules28062546), 2023-03-10
Supplement: s1 [file s1]

# Anti-Zika Virus Activity and Isolation of Flavonoids from Ethanol Extracts of *Curatella americana* L. Leaves

**Lienne D'Auria Lima <sup>1</sup>, Adriana Cotta Cardoso Reis <sup>1</sup>, Jordano Augusto Carvalho Sousa <sup>1</sup>, Gabriel Mendonça Valente <sup>1</sup>, Breno de Mello Silva <sup>2</sup>, Cíntia Lopes de Brito Magalhães <sup>2</sup>, Markus Kohlhoff <sup>3</sup>, Luiz Fernando de Medeiros Teixeira <sup>4</sup> and Geraldo Célio Brandão <sup>1,\*</sup>**

<sup>1</sup> Departamento de Farmácia, Escola de Farmácia, Universidade Federal de Ouro Preto, Campus Morro do Cruzeiro, Ouro Preto 35.400-000, MG, Brazil

<sup>2</sup> Departamento de Ciências Biológicas, Instituto de Ciências Exatas e Biológicas,, Universidade Federal de Ouro Preto, Campus Morro do Cruzeiro, Ouro Preto 35.400-000, MG, Brazil;

<sup>3</sup> Laboratório de Química de Produtos Naturais Bioativos, Fundação Oswaldo Cruz. Instituto René Rachou, Belo Horizonte 30.190-009, MG, Brazil

<sup>4</sup> Departamento de Análises Clínicas, Escola de Farmácia, Universidade Federal de Ouro Preto, Campus Morro do Cruzeiro, Ouro Preto 35.400-000, MG, Brazil

\* Correspondence: celiobrandao@ufop.edu.br; Tel.: +55-31-3559-1088; Fax: +55-31-3559-

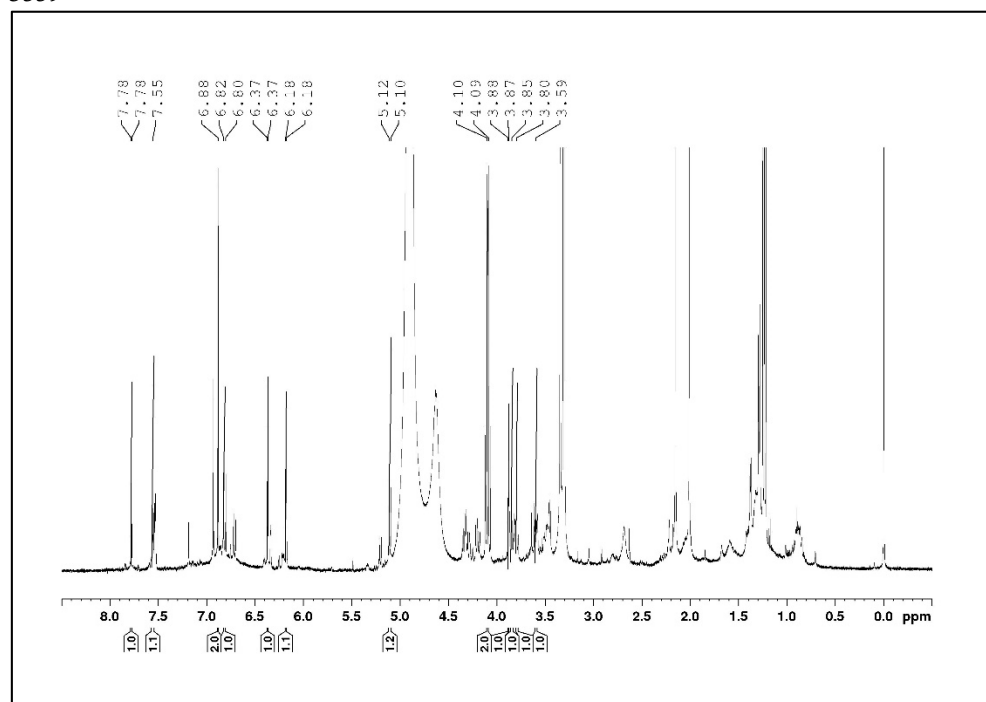

**Figure S1.** –  $^1\text{H}$  NMR spectrum of Quercetin-3-O-hexosylgalate (**1**) (400 Hz,  $\text{CD}_3\text{OD}$ ,  $\delta$ ).

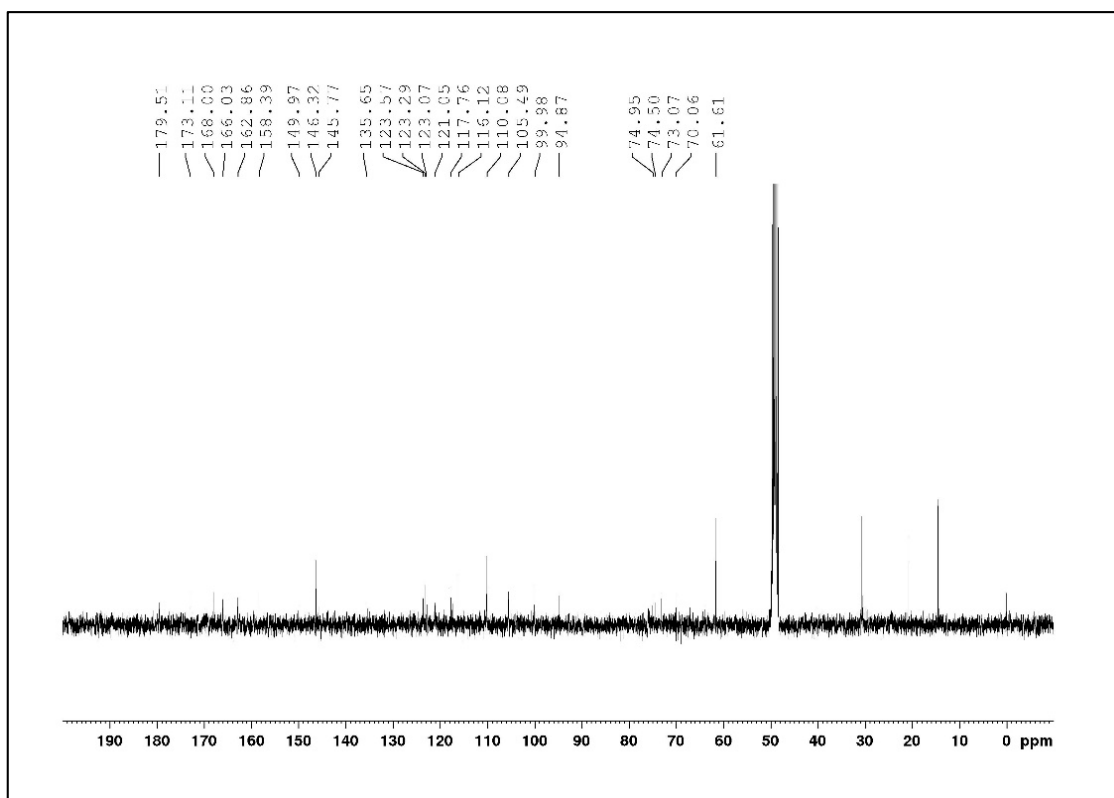

Figure S2. –  $^{13}\text{C}$  NMR spectrum of Quercetin-3-O-hexosylgalate (1) (100 Hz,  $\text{CD}_3\text{OD}$ ,  $\delta$ ).

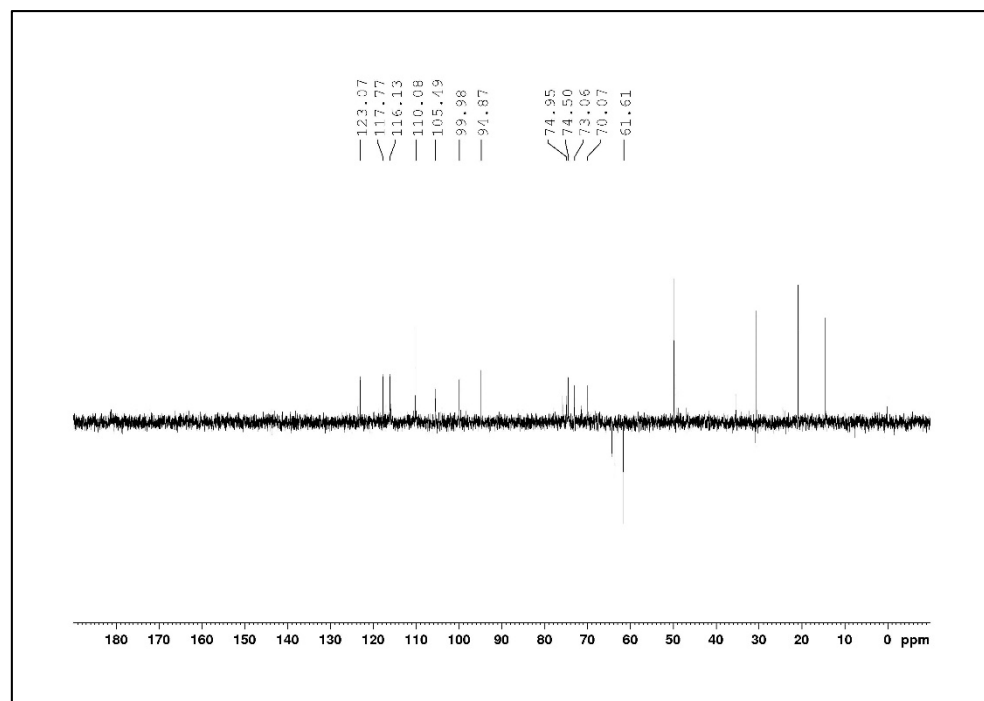

Figure S3. – DEPT-135° NMR spectrum of Quercetin-3-O-hexosylgalate (1) (100 Hz,  $\text{CD}_3\text{OD}$ ,  $\delta$ ).

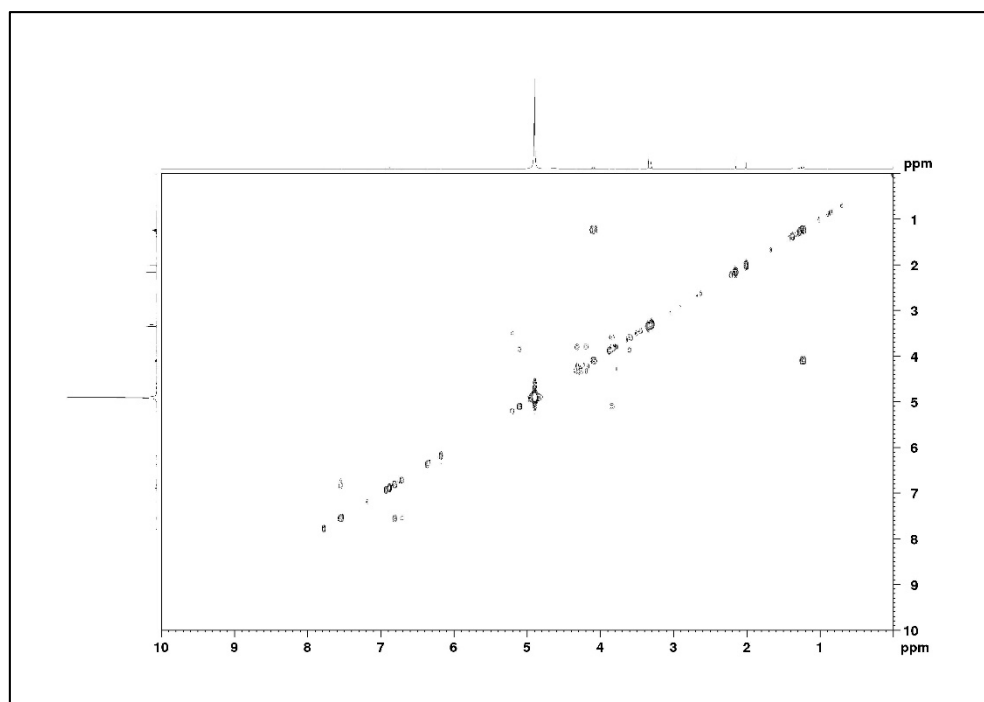

**Figure S4.**—COSY contour map of Quercetin-3-O-hexosylgalate (**1**) (400 Hz, CD<sub>3</sub>OD, δ).

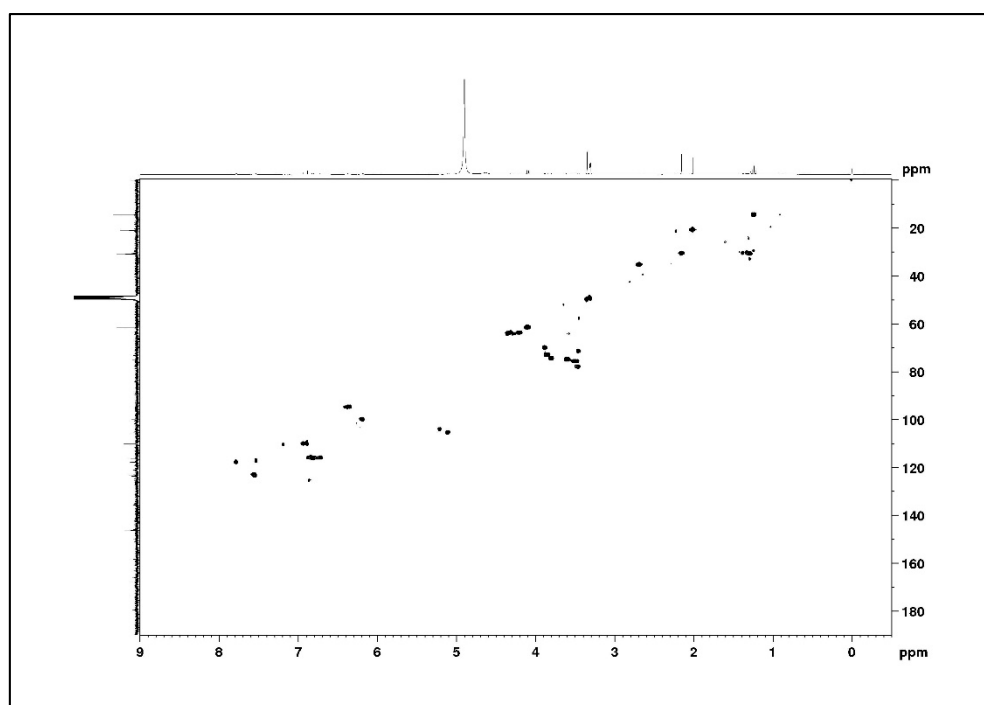

**Figure S5.**—HSQC contour map of Quercetin-3-O-hexosylgalate (**1**) (400 Hz, CD<sub>3</sub>OD, δ).

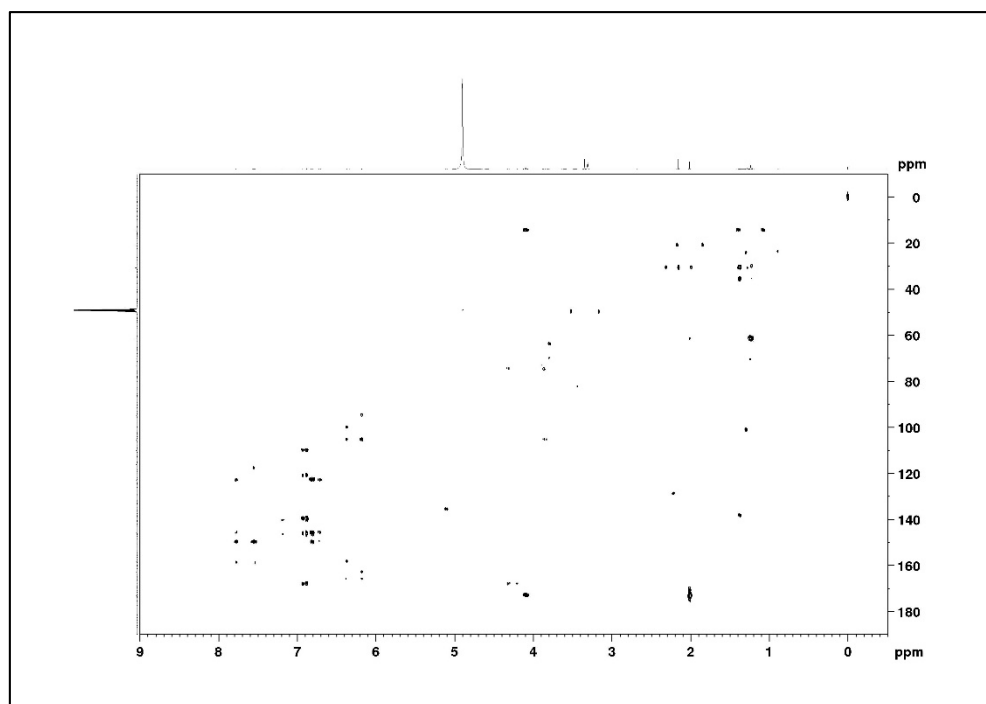

**Figure S6.** – HMBC contour map of Quercetin-3-O-hexosylgalate (**1**) (400 Hz, CD<sub>3</sub>OD,  $\delta$ ).

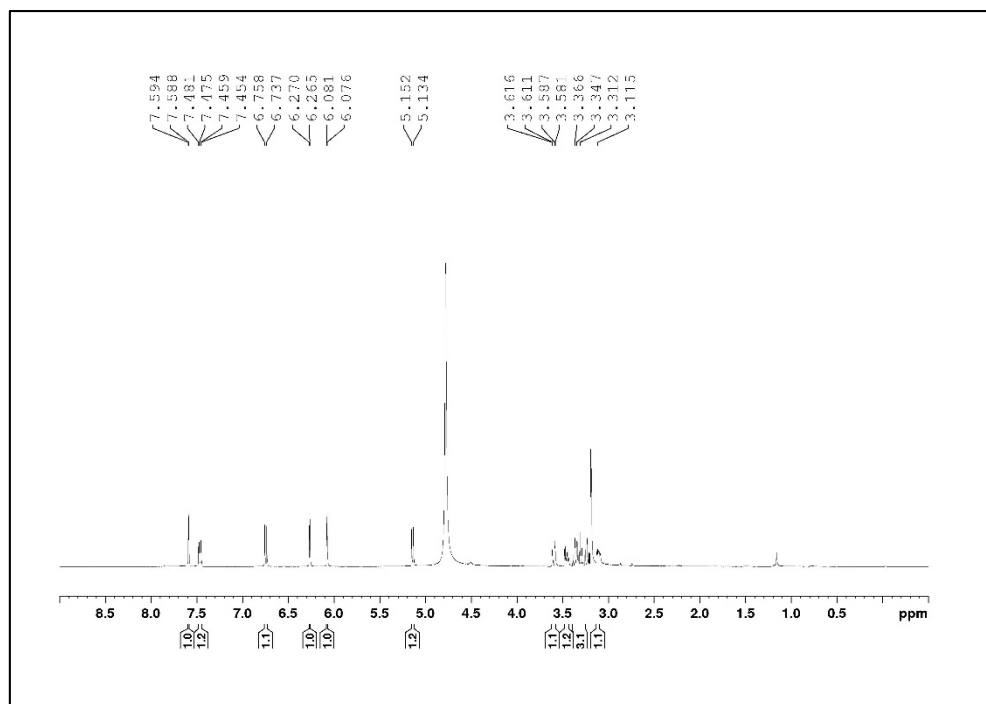

**Figure S7.** –  $^1\text{H}$  NMR spectrum of Quercetin-3-O-glucoside (**2**) (400 Hz,  $\text{CD}_3\text{OD}$ ,  $\delta$ ).

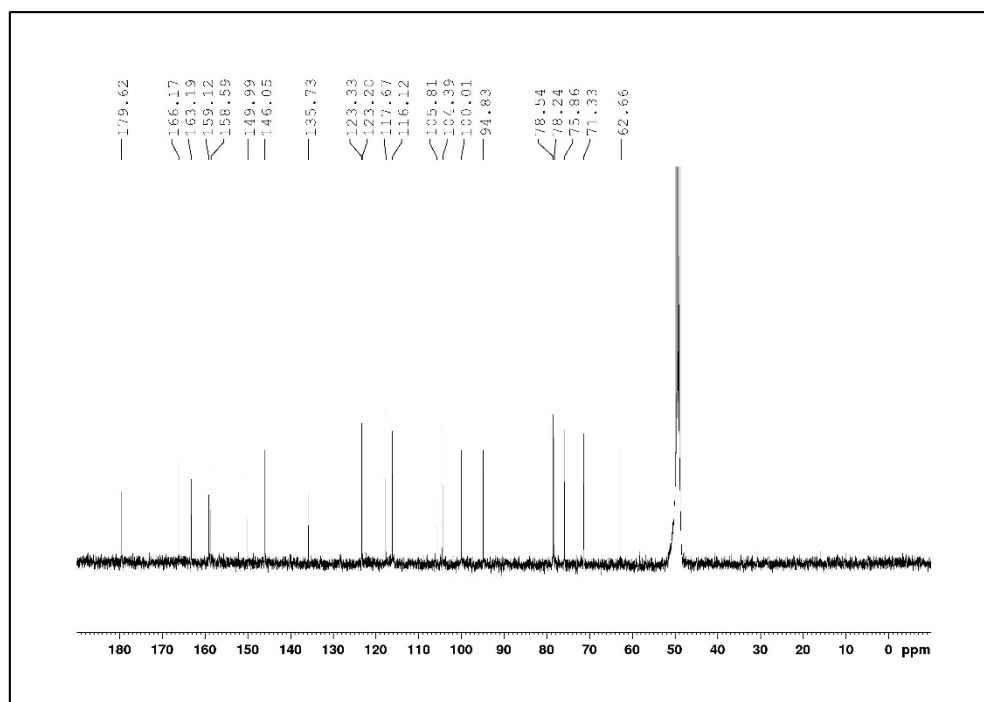

Figure S8. – <sup>13</sup>C NMR spectrum of Quercetin-3-O-glucoside (2) (100 Hz, CD<sub>3</sub>OD, δ).

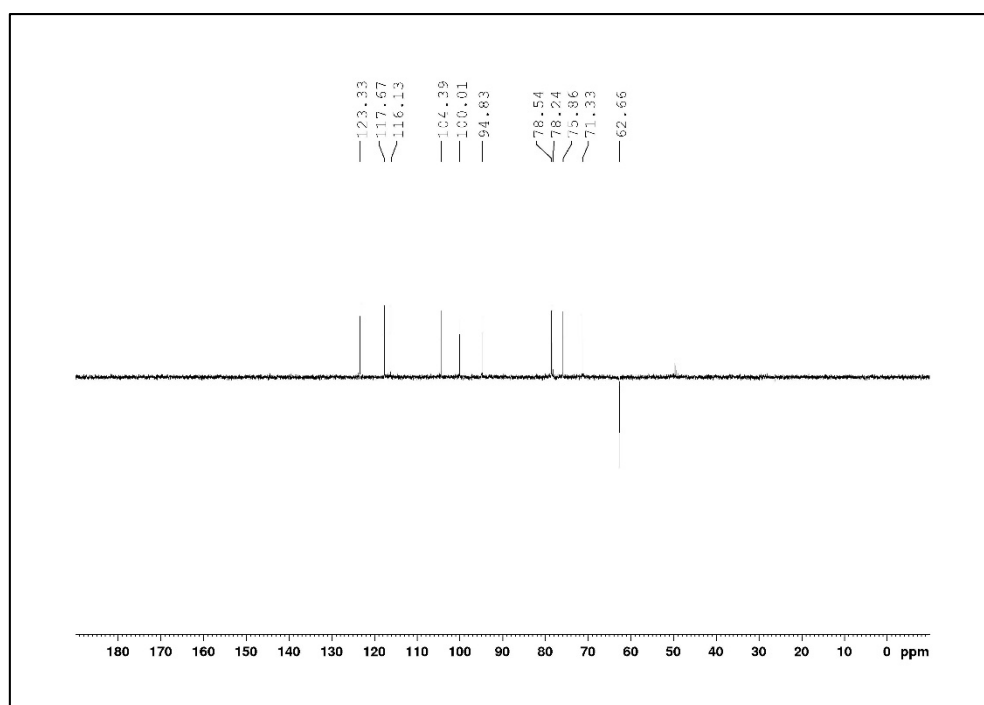

Figure S9. – DEPT-135° NMR spectrum of Quercetin-3-O-glucoside (2) (100 Hz, CD<sub>3</sub>OD, δ).

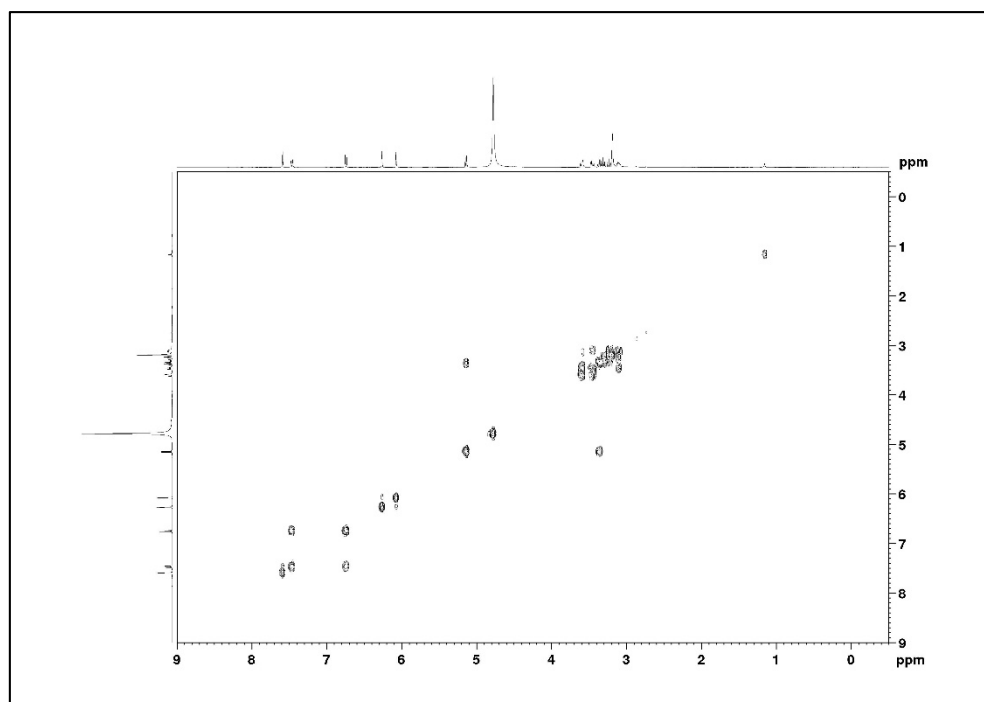

**Figure S10.** – COSY contour map of Quercetin-3-O-glucoside (**2**) (400 Hz, CD<sub>3</sub>OD, δ).

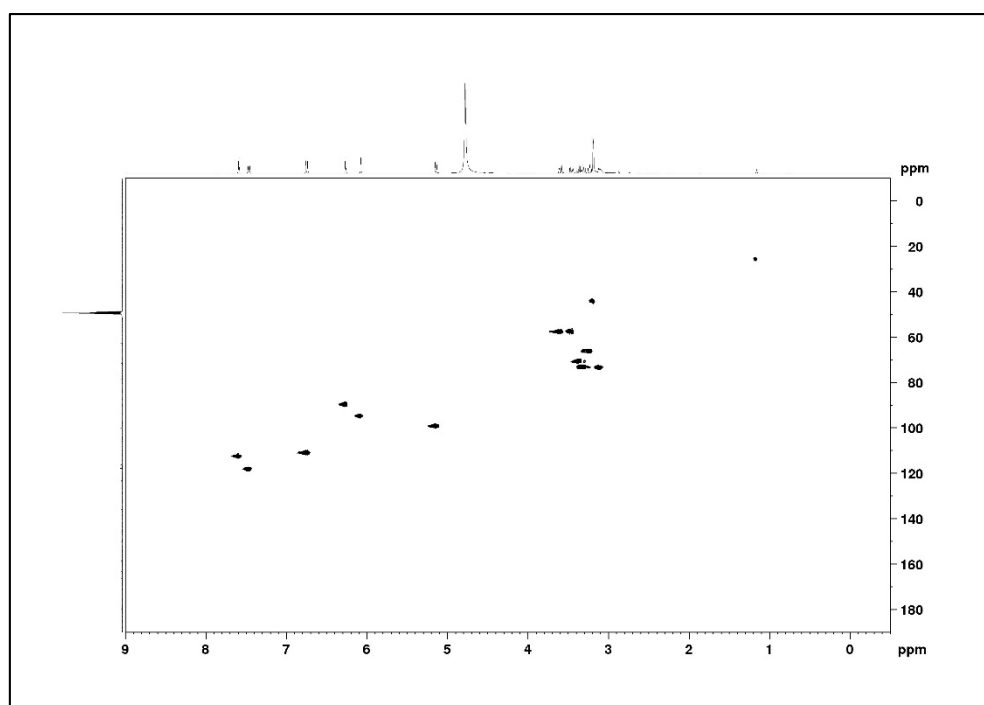

**Figure S11.** – HSQC contour map of Quercetin-3-O-glucoside (**2**) (400 Hz, CD<sub>3</sub>OD, δ).

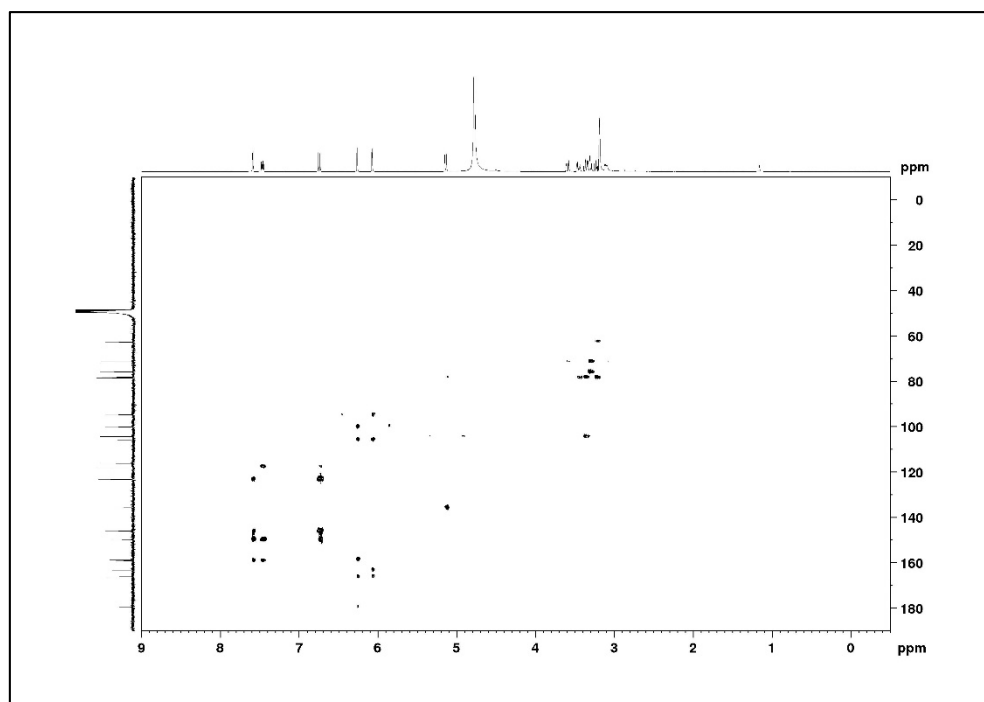

Figure S12. – HMBC contour map of Quercetin-3-O-glucoside (2) (400 Hz, CD<sub>3</sub>OD, δ).

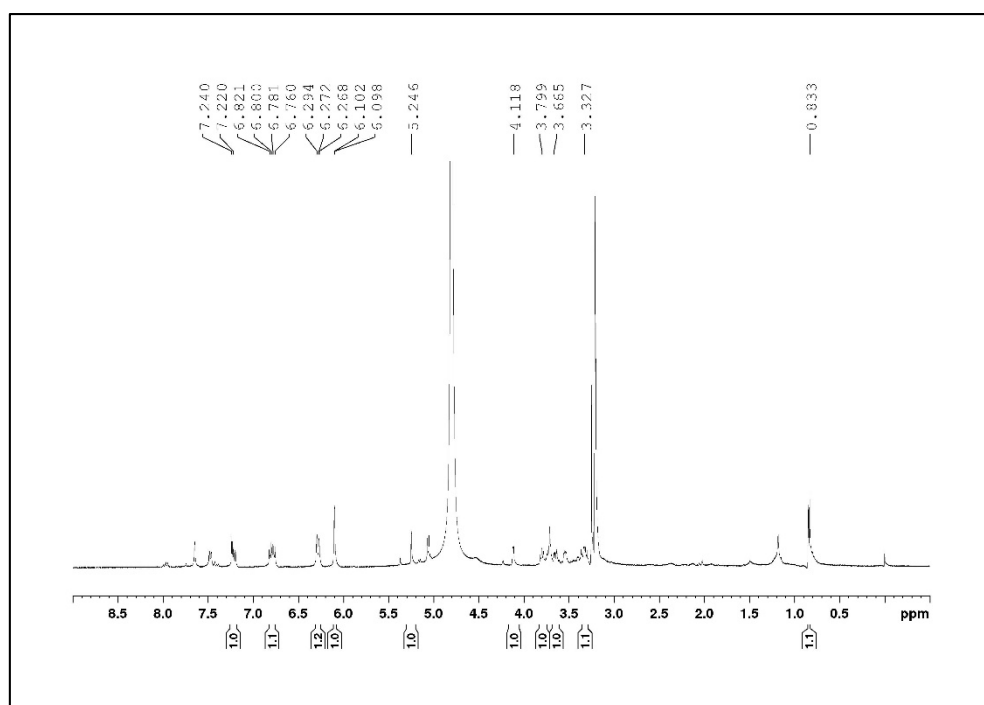

Figure S13. – <sup>1</sup>H NMR spectrum of Quercetin-3-O-rhamnoside (3) (400 Hz, CD<sub>3</sub>OD, δ).

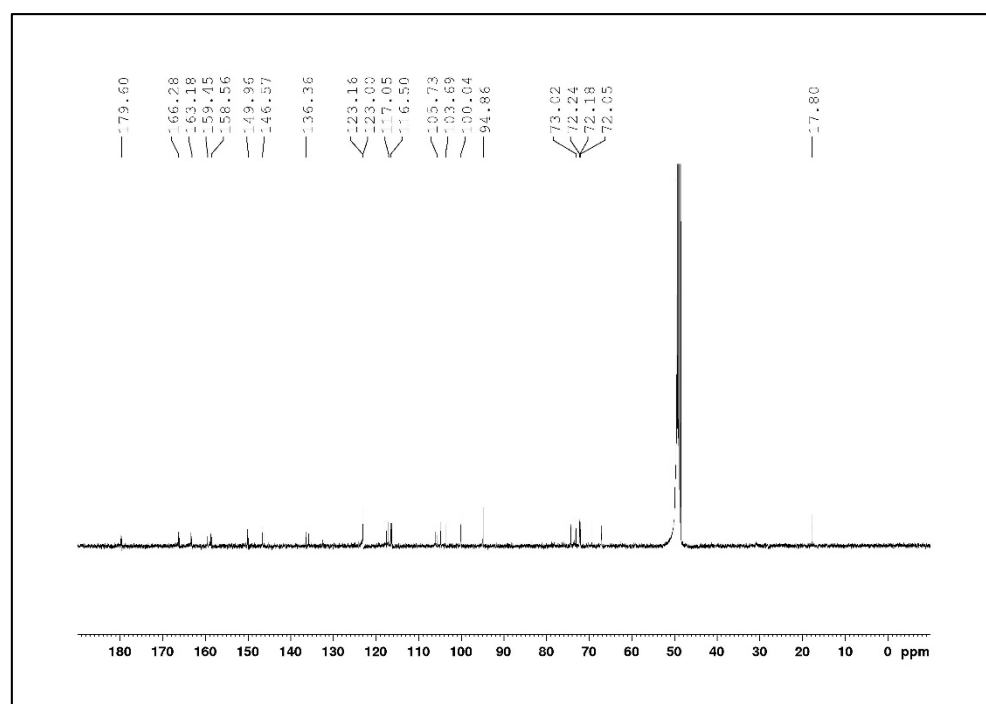

Figure S14. – <sup>13</sup>C NMR spectrum of Quercetin-3-O- rhamnoside (3) (100 Hz, CD<sub>3</sub>OD, δ).

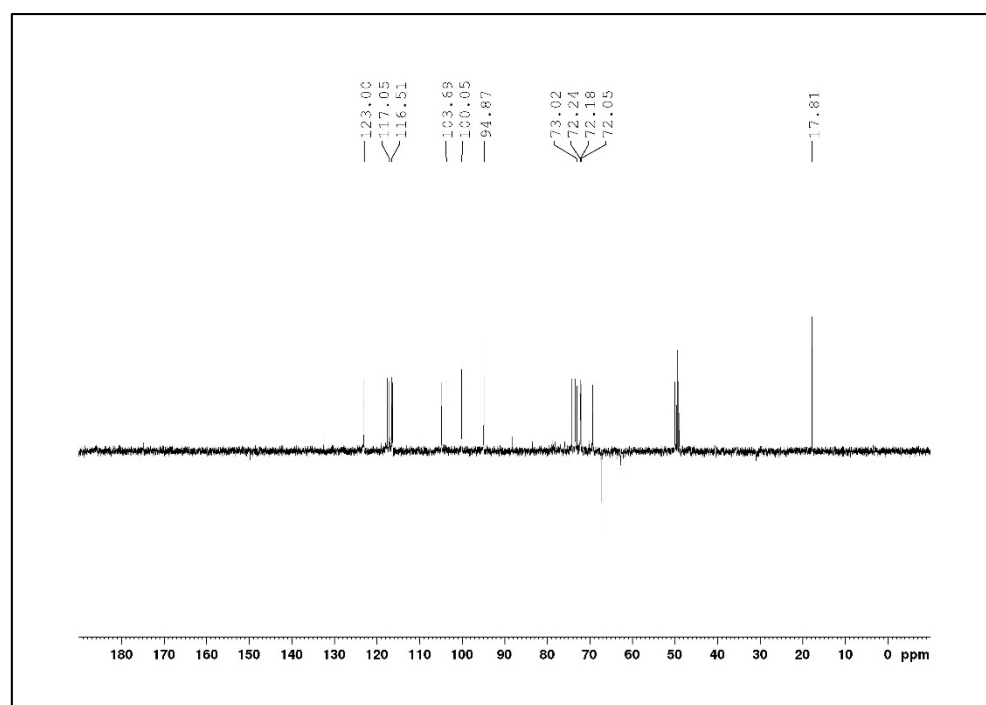

Figure S15. – DEPT-135° NMR spectrum of Quercetin-3-O- rhamnoside (3) (100 Hz, CD<sub>3</sub>OD, δ).

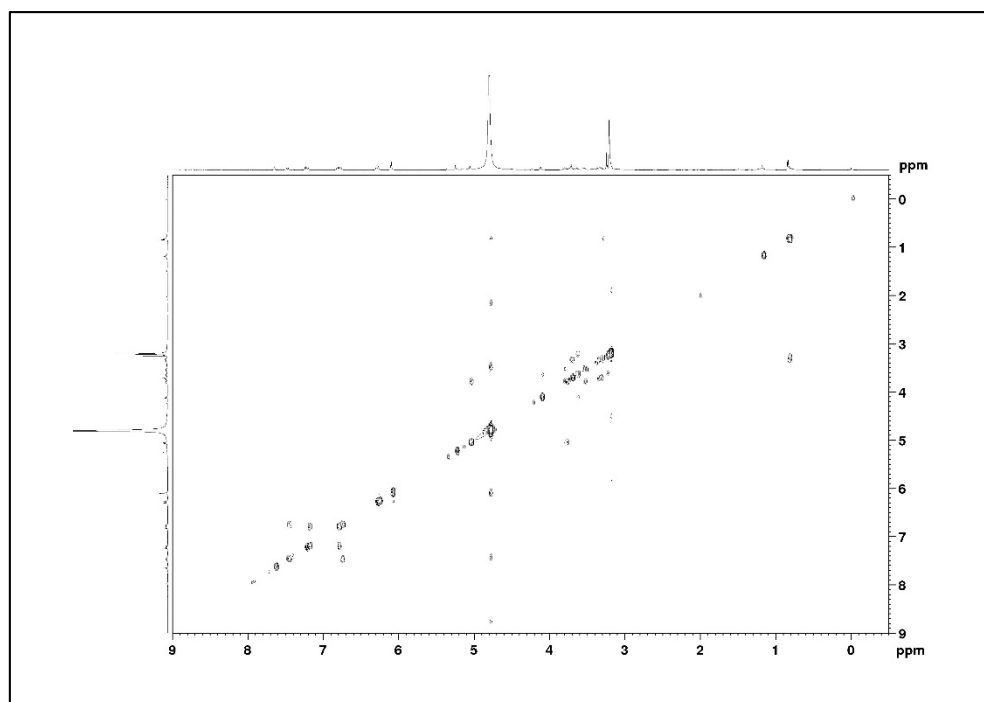

Figure S16. – COSY contour map of Quercetin-3-O- rhamnoside (3) (400 Hz, CD<sub>3</sub>OD, δ).

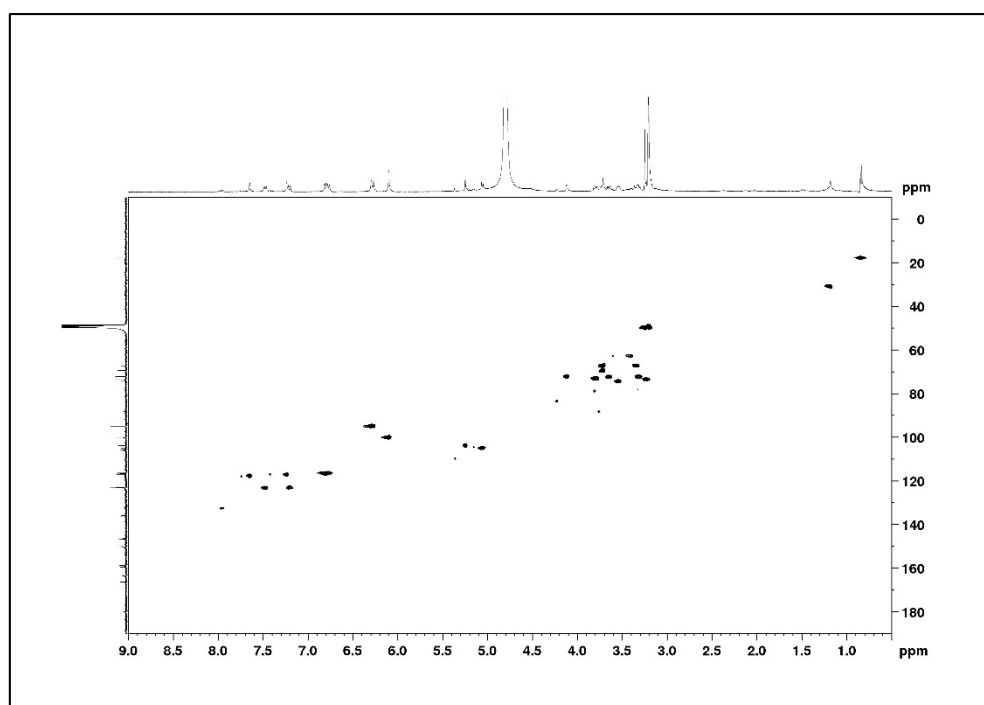

Figure S17. – HSQC contour map of Quercetin-3-O- rhamnoside (3) (400 Hz, CD<sub>3</sub>OD, δ).

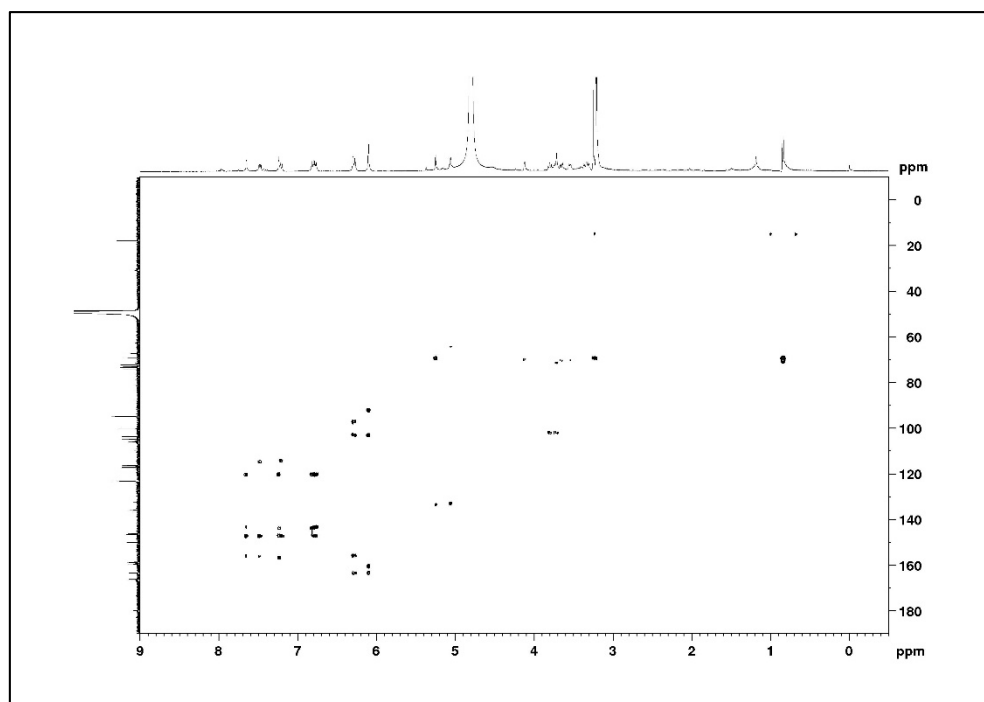

Figure S18. – HMBC contour map of Quercetin-3-O- rhamnoside (3) (400 Hz,  $\text{CD}_3\text{OD}$ ,  $\delta$ ).

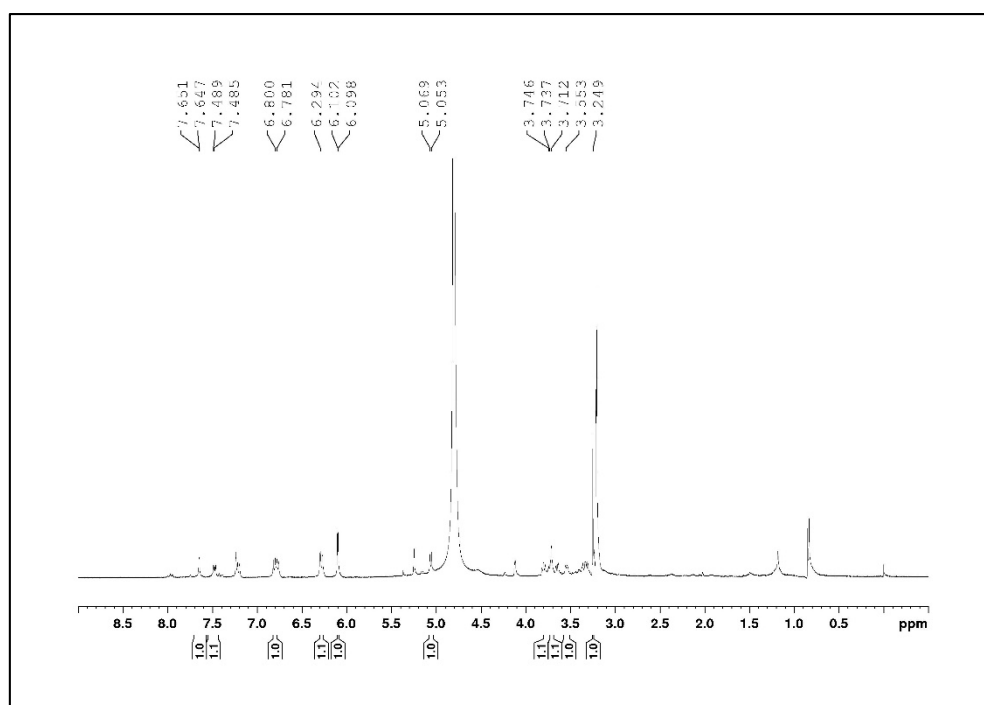

Figure S19. –  $^1\text{H}$  NMR spectrum of Quercetin-3-O- arabinoside (4) (400 Hz,  $\text{CD}_3\text{OD}$ ,  $\delta$ ).

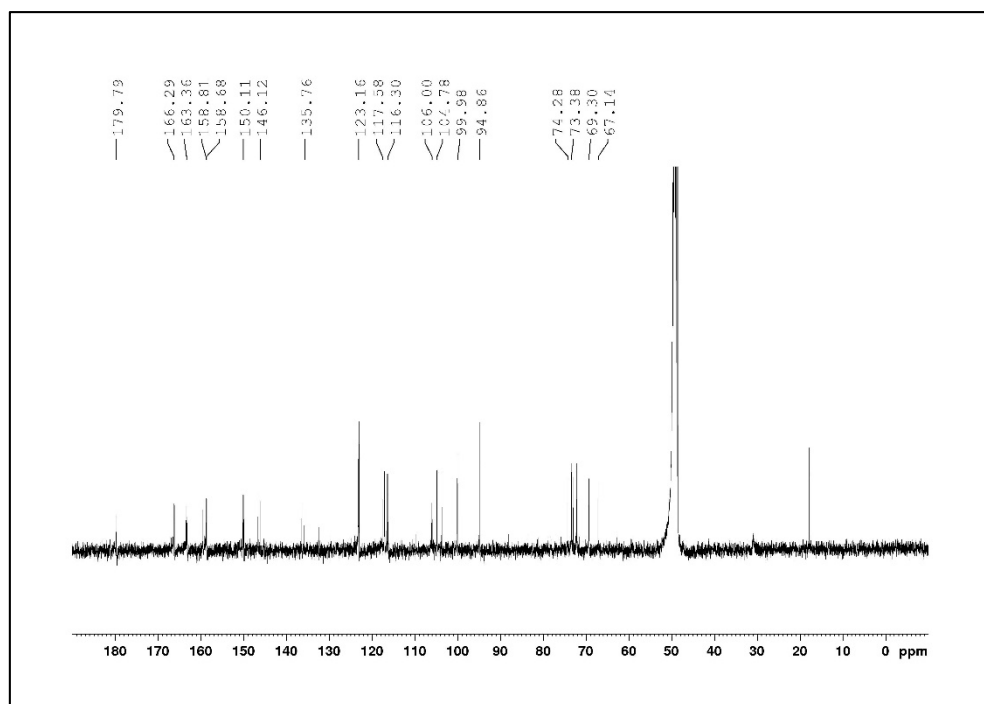

Figure S20. – <sup>13</sup>C NMR spectrum of Quercetin-3-O- arabinoside (**4**) (100 Hz, CD<sub>3</sub>OD, δ).

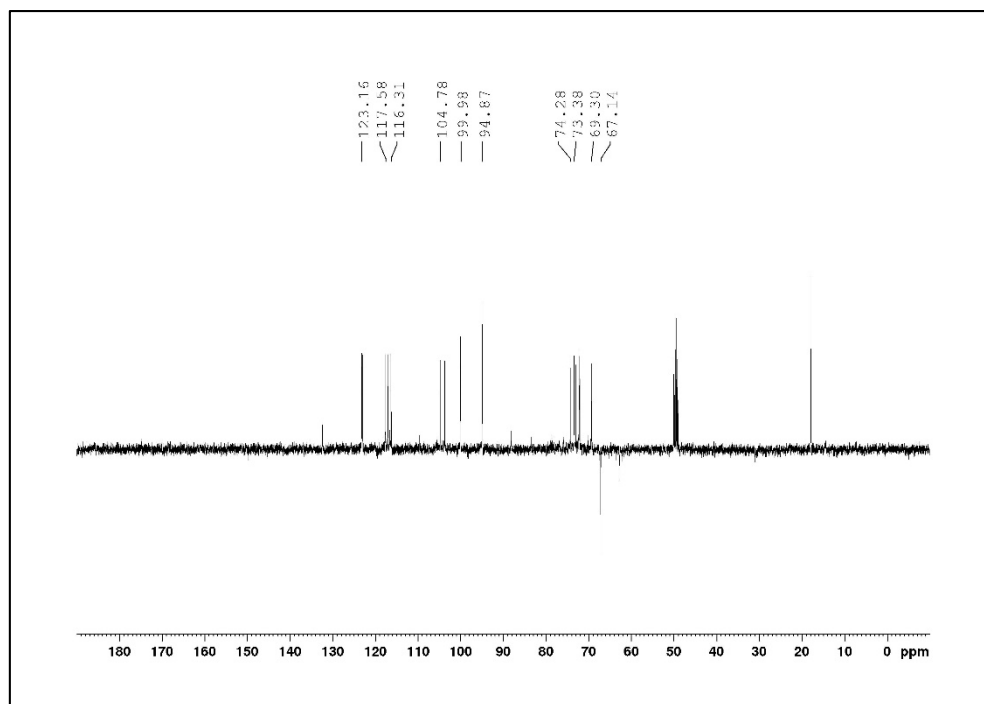

Figure S21. – DEPT-135° NMR spectrum of Quercetin-3-O- arabinoside (**4**) (100 Hz, CD<sub>3</sub>OD, δ).

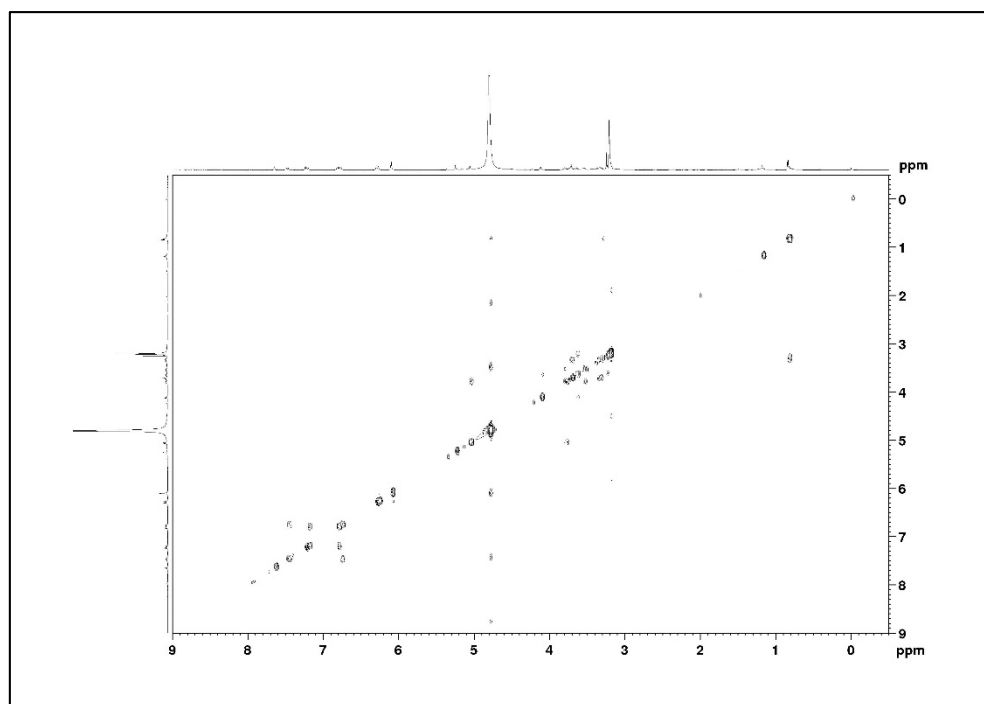

Figure S22. – COSY contour map of Quercetin-3-O- arabinoside (4) (400 Hz, CD<sub>3</sub>OD, δ).



Figure S23. – HSQC contour map of Quercetin-3-O- arabinoside (4) (400 Hz, CD<sub>3</sub>OD, δ).

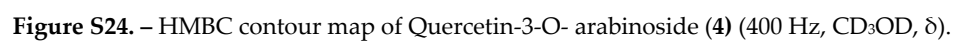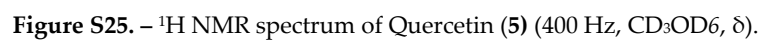

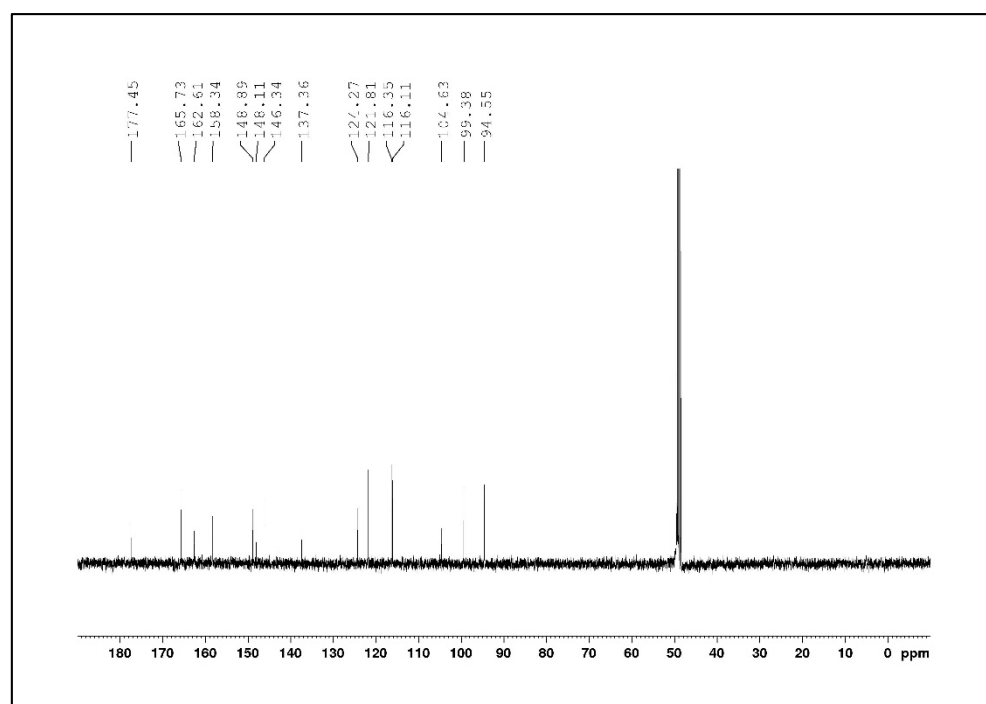

Figure S26. – <sup>13</sup>C NMR spectrum of Quercetin (5) (100 Hz, CD<sub>3</sub>OD, δ).

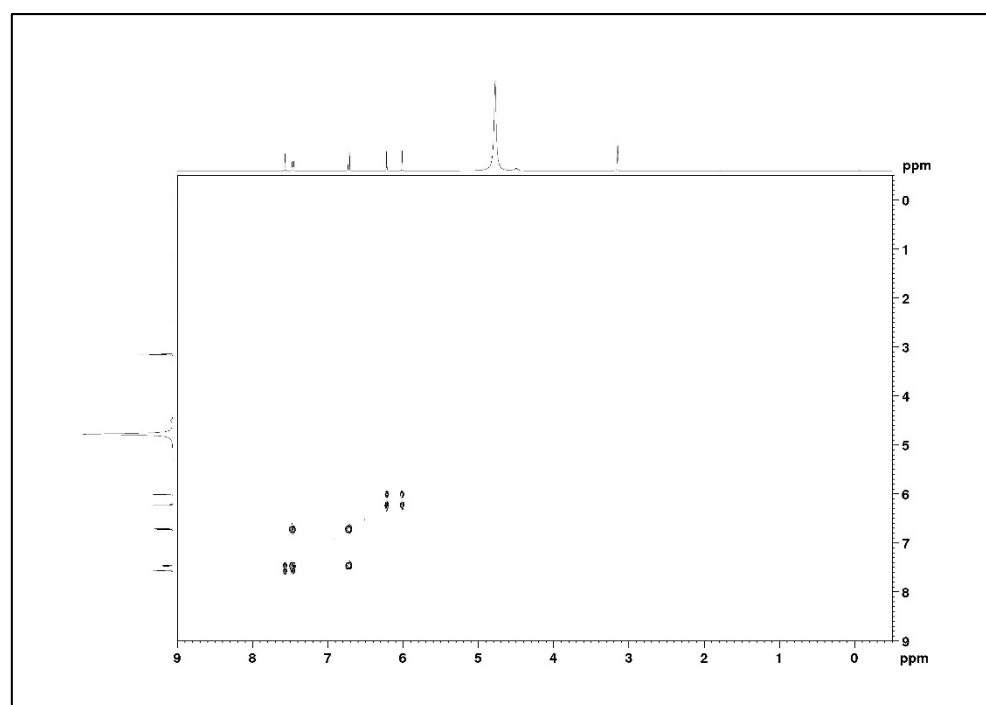

Figure S27. – COSY contour map of Quercetin (5) (400 Hz, CD<sub>3</sub>OD, δ).

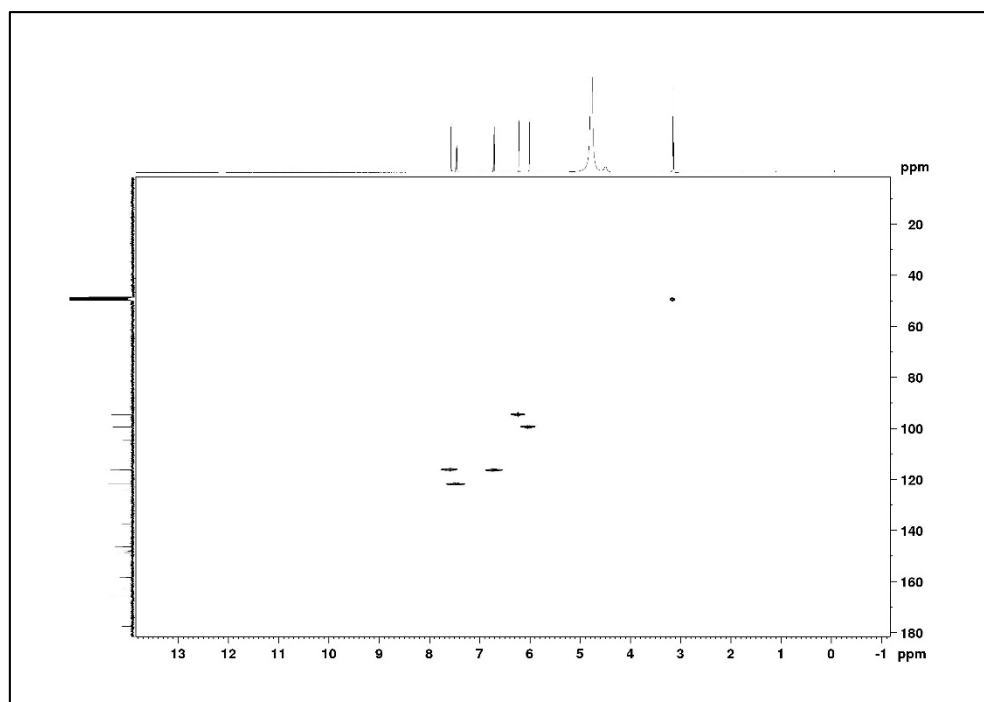

Figure S28. – HSQC contour map of Quercetin (5) (400 Hz, CD<sub>3</sub>OD, δ).

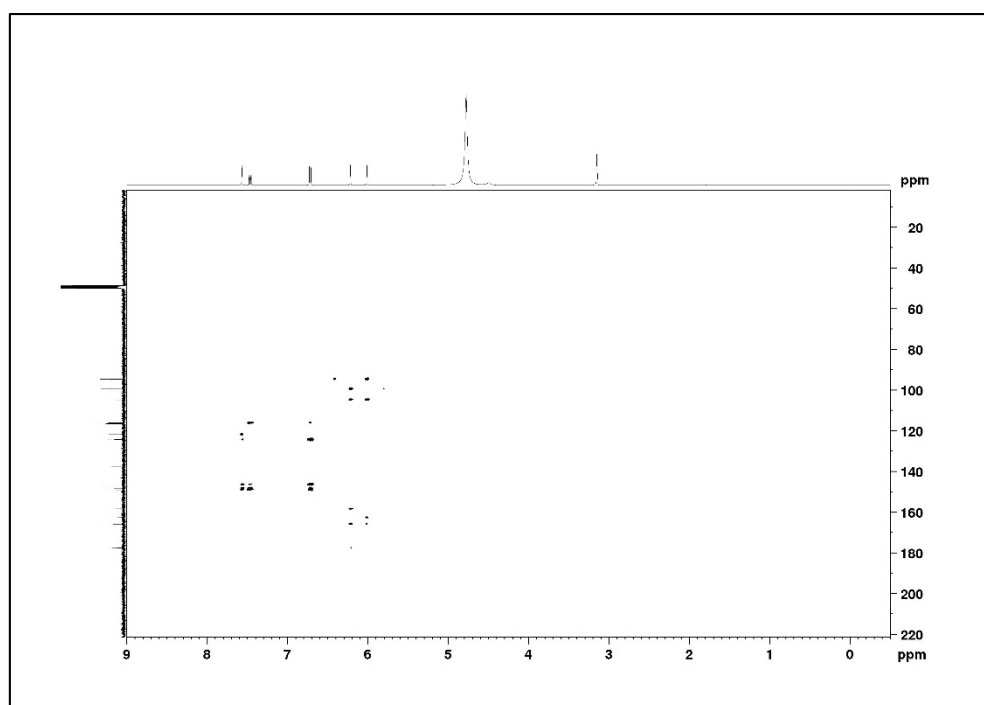

Figure S29. – HMBC contour map of Quercetin (5) (400 Hz, CD<sub>3</sub>OD, δ).
